# Supplementary material
Source: ML conference proceedings conference paper supplement (https://proceedings.neurips.cc/paper_files/paper/2023/hash/46c10f6c8ea5aa6f267bcdabcb123f97-Abstract.html)
Supplement: Supplementary file 1 [file 46c10f6c8ea5aa6f267bcdabcb123f97-Supplemental-Conference.pdf]

## A Non-asymptotic singular value bounds

**Proposition A.1** (Theorem 1.1 of [RV09]). *Let  $\mathbf{A}$  be an  $d \times r$  matrix,  $d \geq r$ , whose entries are independently drawn from  $\mathcal{N}(0, 1)$ . Then for every  $\tau \geq 0$ ,*

$$\Pr\left(\sigma_r(\mathbf{A}) \leq \tau(\sqrt{d} - \sqrt{r-1})\right) \leq (C_1\tau)^{d-r+1} + e^{-C_2d}$$

where  $C_1, C_2 > 0$  are universal constants.

**Proposition A.2** ([Ver10]). *Let  $\mathbf{A}$  be an  $d \times r$  matrix whose entries are independently drawn from  $\mathcal{N}(0, 1)$ . Then for every  $t \geq 0$ , with probability at least  $1 - \exp(-t^2/2)$ , we have*

$$\sigma_r(\mathbf{A}) \geq \sqrt{d} - \sqrt{r} - t$$

and for every  $t \geq 0$ , with probability at least  $1 - \exp(-t^2/2)$ , we have

$$\sigma_1(\mathbf{A}) \leq \sqrt{d} + \sqrt{r} + t$$

## B Proof of Proposition 4.2

First, observe that by assumption,  $\|\mathbf{X}_0\|^2, \|\mathbf{Y}_0\|^2 \leq \frac{9}{16\eta} \leq \frac{1}{\eta}$ . Now, suppose that that  $\|\mathbf{X}_0\|^2, \|\mathbf{Y}_0\|^2 \leq \frac{9}{16\eta}$  and  $\|\mathbf{X}_t\|^2, \|\mathbf{Y}_t\|^2 \leq \frac{1}{\eta}$  for  $t = 0, \dots, T-1$ , and  $1 \leq T \leq \lfloor \frac{1}{32\eta^2 f_0} \rfloor$ . Then by Lemma 4.1,

$$\sum_{t=0}^{T-1} \left\| \nabla_{\mathbf{x}} f(\mathbf{X}_t, \mathbf{Y}_t) \right\|_{\mathbb{F}}^2 \leq \frac{2}{\eta} f_0. \quad (10)$$

Hence,

$$\begin{aligned} \|\mathbf{X}_T - \mathbf{X}_0\| &\leq \eta \left\| \sum_{t=0}^{T-1} \nabla_{\mathbf{x}} f(\mathbf{X}_t, \mathbf{Y}_t) \right\| \leq \eta \left\| \sum_{t=0}^{T-1} \nabla_{\mathbf{x}} f(\mathbf{X}_t, \mathbf{Y}_t) \right\|_{\mathbb{F}} \\ &\leq \eta \sqrt{\sum_{t=0}^{T-1} \|\nabla_{\mathbf{x}} f(\mathbf{X}_t, \mathbf{Y}_t)\|_{\mathbb{F}}^2} \leq \eta \sqrt{\frac{2}{\eta} f_0} = \sqrt{2\eta f_0}. \end{aligned} \quad (11)$$

Then, for  $T \leq T_*$ ,  $\|\mathbf{X}_T\| \leq \|\mathbf{X}_0\| + \|\mathbf{X}_T - \mathbf{X}_0\| \leq \frac{3}{4\sqrt{\eta}} + \sqrt{2T\eta f_0} \leq \frac{1}{\sqrt{\eta}}$ . It follows that  $\|\mathbf{X}_t\|^2 \leq \frac{1}{\eta}$  for  $t = 0, \dots, T$ . Using Lemma 4.1 again, repeating the same argument,

$$\|\mathbf{Y}_t\| \leq \frac{1}{\sqrt{\eta}}, \quad t = 0, \dots, T.$$

Iterate the induction until  $T = T_* = \lfloor \frac{1}{32\eta^2 f_0} \rfloor$ , to obtain  $\|\mathbf{X}_t\|^2, \|\mathbf{Y}_t\|^2 \leq \frac{1}{\eta}$  for  $t = 1, \dots, T_*$ .

Because  $\|\mathbf{X}_T - \mathbf{X}_0\| \leq \sqrt{2\eta T f_0}$  for  $T \leq T_* = \lfloor \frac{1}{32\eta^2 f_0} \rfloor$ ,

$$\sigma_r(\mathbf{X}_T) \geq \sigma_r(\mathbf{X}_0) - \|\mathbf{X}_T - \mathbf{X}_0\|; \quad \sigma_1(\mathbf{X}_T) \leq \sigma_1(\mathbf{X}_0) + \|\mathbf{X}_T - \mathbf{X}_0\|.$$

A similar argument applies to achieve the stated bounds for  $\sigma_r(\mathbf{Y}_T)$  and  $\sigma_1(\mathbf{Y}_T)$ .

## C Proof of Proposition 4.3

Write the SVD  $\mathbf{A} = \mathbf{U}_{m \times r} \mathbf{\Sigma}_{r \times r} \mathbf{V}_{r \times n}^{\top}$  so that  $\mathbf{A} \mathbf{\Phi}_1 = \mathbf{U}_{m \times r} \mathbf{\Sigma}_{r \times r} (\mathbf{V}^{\top} \mathbf{\Phi}_1)$ . Note that  $\mathbf{V}^{\top} \mathbf{\Phi}_1 \in \mathbb{R}^{r \times d}$  has i.i.d. Gaussian entries  $\mathcal{N}(0, \frac{1}{d})$ . By Proposition A.1, with probability at least  $1 - (C_1\epsilon)^{d-r+1} - e^{-C_2d}$ ,

$$\sigma_r(\mathbf{V}^{\top} \mathbf{\Phi}_1) \geq \epsilon \left( 1 - \frac{\sqrt{r-1}}{\sqrt{d}} \right)$$

On the other hand, [Proposition A.2](#) implies that with probability at least  $1 - e^{-r/2} - e^{-d/2}$ ,

$$\sigma_1(\Phi_1) \leq \left(1 + \frac{2\sqrt{r}}{\sqrt{d}}\right) \leq 3, \quad \text{and} \quad \sigma_1(\Phi_2) \leq \left(1 + \frac{2\sqrt{d}}{\sqrt{m}}\right) \leq 3.$$

If all aforementioned events hold,  $\sigma_1(\mathbf{V}^\top \Phi_1) \leq \sigma_1(\mathbf{V})\sigma_1(\Phi_1) \leq 3$ , and

$$\frac{\epsilon \left(1 - \frac{\sqrt{r-1}}{\sqrt{d}}\right)}{\sqrt{\eta}C\sigma_1(\mathbf{A})} \sigma_r(\mathbf{A}) \leq \sigma_r(\mathbf{X}_0) \leq \sigma_1(\mathbf{X}_0) \leq \frac{3}{\sqrt{\eta}C}, \quad \sigma_1(\mathbf{Y}_0) \leq 3\sqrt{\eta}D\sigma_1(\mathbf{A}) \leq \frac{\sqrt{\eta}C\nu\sigma_1(\mathbf{A})}{3}.$$

where the last inequality uses  $D \leq \frac{C\nu}{9}$ . Consequently,

$$1 - \nu \leq 1 - \frac{D}{C}\sigma_1(\Phi_1)\sigma_1(\Phi_2) \leq \left\| \mathbf{I} - \frac{D}{C}\Phi_1\Phi_2^\top \right\| \leq 1 + \frac{D}{C}\sigma_1(\Phi_1)\sigma_1(\Phi_2) \leq 1 + \nu.$$

Hence,

$$\begin{aligned} 2f(\mathbf{X}_0, \mathbf{Y}_0) &= \left\| \mathbf{A} \left( \mathbf{I} - \frac{D}{C}\Phi_1\Phi_2^\top \right) \right\|_F^2 \leq (1 + \nu)^2 \|\mathbf{A}\|_F^2 \\ 2f(\mathbf{X}_0, \mathbf{Y}_0) &\geq \sigma_{\min}^2 \left( \mathbf{I} - \frac{D}{C}\Phi_1\Phi_2^\top \right) \|\mathbf{A}\|_F^2 \geq \frac{1}{(1 - \nu)^2} \|\mathbf{A}\|_F^2 \end{aligned} \quad (12)$$

## D Proof of Corollary 5.3

Set  $\beta_1 = \beta$  as in [\(A2c\)](#). Set  $f_{0(1)} = f_0$ .

By [Corollary 5.2](#), iterating [Assumption 1](#) for  $T_1 = \lfloor \frac{\beta_1}{8\eta^2 f_{0(1)}} \rfloor$  iterations with step-size

$$\eta \leq \frac{\beta_1}{\sqrt{32f_{0(1)} \log(1/\epsilon)}}$$

guarantees that

$$\begin{aligned} \frac{1}{2} \|\mathbf{A} - \mathbf{X}_{T_1} \mathbf{Y}'_{T_1}\|_F^2 &\leq f_{0(2)} := \epsilon f_{0(1)}; \\ \|\sigma_r(\mathbf{X}_{T_1})\|^2 &\geq \frac{1}{4} \frac{\beta_1}{\eta}. \end{aligned}$$

This means that at time  $T_1$ , we can restart the analysis, and appeal again to [Proposition 4.2](#) with modified parameters

- $f(\mathbf{X}_{T_1}, \mathbf{Y}_{T_1}) \leq f_{02} := \epsilon f_{01}$ ,
- $\beta_2 := \frac{\beta_1}{4}$ .

[Corollary 5.2](#) again guarantees that provided

$$\eta \leq \frac{\beta_2}{\sqrt{32f_{0(2)} \log(1/\epsilon)}} = \frac{1}{4\sqrt{\epsilon}} \frac{\beta_1}{\sqrt{32f_{0(1)} \log(1/\epsilon)}} \quad (13)$$

then  $f(\mathbf{X}_{T_1+T_2}, \mathbf{Y}_{T_1+T_2}) \leq \epsilon f(\mathbf{X}_{T_1}, \mathbf{Y}_{T_1}) \leq \epsilon^2 f(\mathbf{X}_0, \mathbf{Y}_0)$  where

$$T_2 = \frac{T_1}{4\epsilon}. \quad (14)$$

We have that [\(13\)](#) is satisfied by assumption as we assume  $\epsilon \leq \frac{1}{16}$ . Repeating this inductively, we find that after  $T = T_1 + \dots + T_k = T_1 \sum_{\ell=0}^{k-1} (\frac{1}{4\epsilon})^\ell \leq T_1 (\frac{1}{4\epsilon})^k$  iterations, we are guaranteed that  $f(\mathbf{X}_T, \mathbf{Y}_T) \leq \epsilon^k f(\mathbf{X}_0, \mathbf{Y}_0)$ . This is valid for any  $T \in \mathbb{N}$  because we may always apply

Proposition 4.2 in light of summability and  $C \geq 8$ : for any  $t$ ,

$$\begin{aligned}
\sigma_1(\mathbf{X}_t) &\leq \sigma_1(\mathbf{X}_0) + \sqrt{\eta} \sum_{j=1}^k \sqrt{2T_k f_{0(k)}} \\
&\leq \frac{3}{8\sqrt{\eta}} + \frac{1}{\sqrt{\eta}} \sum_{j=1}^k \sqrt{2(1/(4\epsilon))^j \frac{\beta_1}{8f_{01}} \epsilon^j f_{0(1)}} \\
&\leq \frac{3}{8\sqrt{\eta}} + \frac{\sqrt{\beta}}{2\sqrt{\eta}} \sum_{j=1}^k (1/2)^j \\
&\leq \frac{3 + 4\sqrt{\beta}}{8\sqrt{\eta}} \leq \frac{1}{2\sqrt{\eta}}.
\end{aligned}$$
